# Supplementary material for: A fuzzy method for RNA-Seq differential expression analysis in presence of multireads
Source: PubMed Central journal article supplement (PMC5123383; doi:10.1186/s12859-016-1195-2), 2016-11-08
Supplement: 12859_2016_1195_MOESM1_ESM.pdf [file 12859_2016_1195_MOESM1_ESM.pdf]

# A fuzzy method for RNA-Seq differential expression analysis in presence of multireads

Arianna Consiglio<sup>1§</sup>, Corrado Mencar<sup>2</sup>, Giorgio Grillo<sup>1</sup>, Flaviana Marzano<sup>1</sup>, Mariano Francesco Caratozzolo<sup>1</sup>, Sabino Liuni<sup>1</sup>

<sup>1</sup> Institute for Biomedical Technologies of Bari - ITB, National Research Council, Bari, 70126, IT

<sup>2</sup> Department of Informatics, University of Bari Aldo Moro, Bari, 70121, IT.

§ Corresponding author

---

## Supplementary information

### Parameters used for the analyses

All the dataset used have passed a Quality check performed with the FastQC tool [<http://www.bioinformatics.babraham.ac.uk/projects/fastqc/>]. All the reads have a good quality and any of them was removed or trimmed.

For the Multiple Sclerosis dataset only the best (in terms of mean read quality) four datasets from case and control were selected for the second trial, in order to limit the complexity of the study and to keep the results as easily assessable by eye. It is known that Multiple Sclerosis is a complex and multi-factorial disease and the biological variability highly influences the uncertainty in the results.

This is the list of the tools used, with their version:

- TopHat v2.0.11
- Cuffdiff v2.2.1
- DESeq2 and edgeR (Bioconductor v.3.2)
- BLAST+ v2.2.28+
- Bowtie2 v2.2.1
- Samtools v0.1.19

All the tools were used with the default parameters, except for the following values: TopHat was used with the option `--report-secondary-alignments` and Bowtie2 with the `-k` parameter in order to obtain multireads. Reads mapping to more than 100 different reference sequences were discarded.

Cuffdiff was used with `--multi-read-correct` option, in order to activate the 'rescue method' for multireads.

### Fuzzy boundaries: fitting the hyperbolas

With the aim of defining which areas of the plot include significant DE events and which includes less important variations in expression, two boundaries are defined in the MA-plot. In particular, the borders of the right part of the rhomboid obtained when plotting mean expression versus logarithmic fold change are fitted on the data by using two curves. They provide information to determine the significance of the fold change, following its dependency from the value of the mean expression.

The functions implemented for the curves combine logarithmic and hyperbolic characteristics. It computes the logarithm of a ratio, as in the computation of fold change, and the chosen ratio allows to have two asymptotes: a vertical asymptote on  $x = 0$  and a horizontal asymptote on  $y = 0$ . If we want to exploit the horizontal asymptote as a threshold for the fold change, the constant  $c \geq 0$  can be used, otherwise it can be

set to 0. For example, many biologists use 0.6 or 1 as thresholds for interesting  $\log_2$  fold change values ( $\log_2$  fold change values of 0.6 and 1 correspond to a change in expression of about 1.5 times or of 2 times the expected value). The resulting function is:

$$y = \pm \left( q \log_2 \left( x + \frac{1}{x} \right) + c \right)$$

The function is defined for  $x > 0$ ;  $x$  represents the mean expression of genes detected in case and/or control (and, therefore, it is strictly positive) and the  $y$  represents the logarithmic fold change. The ' $\pm$ ' indicates the sign of the function. For over-expressed data in the upper part of the plot, the relative curve is the one obtained using the *plus*, for under-expressed data in the lower part of the plot, the curve is computed using the *minus*. These curves serve as fuzzy boundaries for DE events, and we adapt them through the parameter  $q$ , by using least squares fitting on the most extreme values of the right part of the rhomboid (we are not interested in the left part of the rhomboidal distribution, because it represents genes with too small expressions, anyway those points do not influence the fit because they represent a small percentage of the data). Since the aim of the method is to provide a ranking of the most reliable results in term of increasing same-expression possibility, and in this method the hyperbolas act as a fuzzy threshold for the possibilities, the accuracy of the fit for the hyperbolas is not of primary importance.

## Multiple Sclerosis dataset: additional data

The following table shows the genes selected by at least two workflows in the analysis of Multiple Sclerosis dataset.

| Gene       | TopHat(unique) & cuffdiff | TohHat(rescue) & cuffdiff | Unique & DESeq2 | RSEM & DESeq2 | Centroid & | Unique & edgeR | RSEM & edgeR | Centroid & edgeR | Under-expr. Poss. | Same-expr. Poss. | Over-expr. Poss. |
|------------|---------------------------|---------------------------|-----------------|---------------|------------|----------------|--------------|------------------|-------------------|------------------|------------------|
| S100A8     | X                         | X                         | X               | X             | X          |                |              |                  | 1.00              | 0.80             | 0.00             |
| FADS2      | X                         |                           | X               | X             | X          |                |              |                  | 0.19              | 1.00             | 0.99             |
| HLA-DRA    |                           |                           |                 |               | X          | X              |              | X                | 1.00              | 1.00             | 1.00             |
| NCRNA00176 |                           |                           | X               | X             | X          |                |              |                  | 0.01              | 1.00             | 0.64             |
| TSHZ2      |                           |                           | X               | X             | X          |                |              |                  | 0.09              | 1.00             | 0.98             |
| SMIM1      | X                         | X                         |                 |               |            |                |              |                  | 0.12              | 1.00             | 0.02             |
| IFI6       | X                         | X                         |                 |               |            |                |              |                  | 1.00              | 0.97             | 0.94             |
| DAB1       |                           |                           | X               | X             |            |                |              |                  | 1.00              | 1.00             | 1.00             |
| S100A12    | X                         | X                         |                 |               |            |                |              |                  | 0.98              | 0.96             | 0.00             |
| HMG4       | X                         | X                         |                 |               |            |                |              |                  | 0.21              | 1.00             | 0.05             |
| DDX58      | X                         | X                         |                 |               |            |                |              |                  | 1.00              | 1.00             | 0.09             |
| TOR1B      | X                         | X                         |                 |               |            |                |              |                  | 0.99              | 1.00             | 0.07             |
| RNASE6     | X                         | X                         |                 |               |            |                |              |                  | 0.89              | 1.00             | 0.05             |
| HLA-DRB5   | X                         | X                         |                 |               |            |                |              |                  | 1.00              | 0.72             | 0.01             |
| DDAH2      |                           |                           |                 | X             |            |                | X            |                  | 1.00              | 1.00             | 0.99             |
| MDC1       |                           |                           |                 | X             |            |                | X            |                  | 1.00              | 1.00             | 1.00             |
| SIGLEC1    | X                         | X                         |                 |               |            |                |              |                  | 1.00              | 1.00             | 0.45             |
| MPZL1      | X                         | X                         |                 |               |            |                |              |                  | 1.00              | 1.00             | 0.22             |

|              |   |   |   |   |   |   |   |  |      |      |      |
|--------------|---|---|---|---|---|---|---|--|------|------|------|
| ISG15        | X | X |   |   |   |   |   |  | 1.00 | 1.00 | 0.66 |
| AGRN         | X | X |   |   |   |   |   |  | 1.00 | 1.00 | 0.13 |
| MX1          | X | X |   |   |   |   |   |  | 1.00 | 1.00 | 1.00 |
| C21orf33     |   |   |   | X |   |   | X |  | 1.00 | 1.00 | 1.00 |
| RSAD2        | X | X |   |   |   |   |   |  | 1.00 | 1.00 | 0.89 |
| COL18A1      |   |   | X | X |   |   |   |  | 1.00 | 1.00 | 1.00 |
| EIF2AK2      | X | X |   |   |   |   |   |  | 1.00 | 1.00 | 0.09 |
| NFXL1        | X | X |   |   |   |   |   |  | 0.24 | 1.00 | 0.02 |
| MYOM2        | X | X |   |   |   |   |   |  | 1.00 | 1.00 | 0.10 |
| IGJ          | X | X |   |   |   |   |   |  | 1.00 | 1.00 | 1.00 |
| PPBP         | X | X |   |   |   |   |   |  | 0.97 | 1.00 | 0.02 |
| HERC5        | X | X |   |   |   |   |   |  | 1.00 | 1.00 | 0.06 |
| IL1RN        | X | X |   |   |   |   |   |  | 1.00 | 1.00 | 0.04 |
| MYL12B       | X | X |   |   |   |   |   |  | 0.93 | 1.00 | 0.13 |
| TNFAIP6      | X | X |   |   |   |   |   |  | 0.55 | 1.00 | 0.03 |
| CIT          | X | X |   |   |   |   |   |  | 0.05 | 1.00 | 0.10 |
| ARRDC4       | X | X |   |   |   |   |   |  | 0.97 | 1.00 | 0.03 |
| IGHG2        | X | X |   |   |   |   |   |  | 1.00 | 1.00 | 1.00 |
| OASL         | X | X |   |   |   |   |   |  | 1.00 | 1.00 | 0.09 |
| NSUN5P1      |   |   |   | X | X |   |   |  | 0.88 | 1.00 | 1.00 |
| CD86         | X | X |   |   |   |   |   |  | 0.41 | 0.99 | 0.01 |
| CSTA         | X | X |   |   |   |   |   |  | 0.09 | 1.00 | 0.01 |
| BPG246D15.9  |   |   | X | X |   |   |   |  | 1.00 | 1.00 | 1.00 |
| IMMP1L       | X | X |   |   |   |   |   |  | 0.02 | 1.00 | 0.05 |
| CD248        | X | X |   |   |   |   |   |  | 0.40 | 1.00 | 1.00 |
| CADM1        | X | X |   |   |   |   |   |  | 0.09 | 1.00 | 0.09 |
| KRT1         | X | X |   |   |   |   |   |  | 0.06 | 1.00 | 0.99 |
| C12orf42     |   |   |   | X |   | X |   |  | 0.01 | 1.00 | 0.44 |
| C14orf64     |   |   |   |   | X | X |   |  | 0.01 | 0.99 | 0.67 |
| CTC-490G23.2 | X | X |   |   |   |   |   |  | 0.91 | 1.00 | 0.06 |
| CD177        | X | X |   |   |   |   |   |  | 1.00 | 1.00 | 0.44 |

The following table shows the estimated read counts and the fuzzy read counts of the genes selected by at least two workflows in the analysis of Multiple Sclerosis dataset.

| Gene       | Unique CTRL | Unique CASE | RSEM CTRL | RSEM CASE | Centroid CTRL | Centroid CASE | Fuzzy count CTRL        | Fuzzy count CASE         |
|------------|-------------|-------------|-----------|-----------|---------------|---------------|-------------------------|--------------------------|
| S100A8     | 1421        | 3290        | 1756      | 4097      | 1967          | 3756          | Tr[1421,1421,2448,2448] | Tr[3290,3290,4439,4439]  |
| FADS2      | 257         | 155         | 774       | 366       | 798           | 342           | Tr[257,257,1153,1184]   | Tr[155,155,575,605]      |
| HLA-DRA    | 0           | 784         | 37        | 7935      | 753           | 3859          | Tr[0,0,6516,10313]      | Tr[784,1682,13439,14686] |
| NCRNA00176 | 18          | 6           | 78        | 11        | 93            | 11            | Tr[18,22,208,212]       | Tr[6,6,22,22]            |
| TSHZ2      | 78          | 34          | 251       | 87        | 252           | 84            | Tr[78,78,583,802]       | Tr[34,35,155,263]        |
| SMIM1      | 17          | 47          | 40        | 104       | 44            | 95            | Tr[17,17,75,75]         | Tr[47,47,149,149]        |

|              |      |      |      |      |      |       |                         |                           |
|--------------|------|------|------|------|------|-------|-------------------------|---------------------------|
| IFI6         | 860  | 699  | 1291 | 4732 | 1489 | 5178  | Tr[860,866,2105,2118]   | Tr[699,714,15560,15643]   |
| DAB1         | 53   | 20   | 92   | 39   | 282  | 289   | Tr[53,57,1288,4913]     | Tr[20,25,1958,8163]       |
| S100A12      | 223  | 1022 | 497  | 1271 | 540  | 1184  | Tr[223,230,839,839]     | Tr[1022,1023,1250,1250]   |
| HMGNA4       | 482  | 696  | 628  | 856  | 711  | 774   | Tr[482,482,945,946]     | Tr[696,696,928,935]       |
| DDX58        | 777  | 909  | 971  | 1866 | 1113 | 1873  | Tr[777,782,1282,1310]   | Tr[909,914,3621,3662]     |
| TOR1B        | 794  | 669  | 767  | 1463 | 865  | 1486  | Tr[794,796,974,978]     | Tr[669,669,2809,2815]     |
| RNASE6       | 245  | 613  | 411  | 944  | 462  | 865   | Tr[245,245,837,837]     | Tr[613,613,1035,1035]     |
| HLA-DRB5     | 121  | 3099 | 681  | 4673 | 702  | 4282  | Tr[121,126,2367,3235]   | Tr[3099,3779,4776,5873]   |
| DDAH2        | 0    | 0    | 0    | 255  | 50   | 81    | Tr[0,0,385,417]         | Tr[0,6,731,777]           |
| MDC1         | 0    | 0    | 52   | 0    | 47   | 41    | Tr[0,0,664,676]         | Tr[0,0,604,612]           |
| SIGLEC1      | 158  | 156  | 320  | 1394 | 370  | 1555  | Tr[158,158,576,580]     | Tr[156,156,4976,4979]     |
| MPZL1        | 1012 | 1921 | 1622 | 3561 | 1805 | 3254  | Tr[1012,1031,2832,2885] | Tr[1921,1952,4491,4532]   |
| ISG15        | 498  | 458  | 652  | 3034 | 768  | 3349  | Tr[498,498,1216,1225]   | Tr[458,458,10865,10873]   |
| AGRN         | 33   | 26   | 57   | 128  | 83   | 187   | Tr[33,33,174,178]       | Tr[26,26,743,748]         |
| MX1          | 1705 | 1538 | 2931 | 9702 | 3123 | 10218 | Tr[1705,1709,4998,5098] | Tr[1538,1541,29851,29945] |
| C21orf33     | 0    | 2    | 132  | 665  | 331  | 441   | Tr[0,7,1033,1216]       | Tr[2,75,1284,1289]        |
| RSAD2        | 390  | 301  | 571  | 2170 | 686  | 2389  | Tr[390,390,1150,1153]   | Tr[301,301,7656,7658]     |
| COL18A1      | 196  | 353  | 246  | 498  | 1145 | 1605  | Tr[196,200,2495,2509]   | Tr[353,353,4812,4851]     |
| EIF2AK2      | 1381 | 1428 | 1403 | 2743 | 1572 | 2818  | Tr[1381,1385,1906,1937] | Tr[1428,1430,5730,5753]   |
| NFXL1        | 44   | 68   | 60   | 134  | 67   | 130   | Tr[44,44,113,115]       | Tr[68,68,254,274]         |
| MYOM2        | 29   | 29   | 59   | 582  | 66   | 579   | Tr[29,29,148,168]       | Tr[29,29,1787,1799]       |
| IGJ          | 0    | 0    | 190  | 514  | 113  | 240   | Tr[0,0,404,411]         | Tr[0,0,1019,1035]         |
| PPBP         | 69   | 144  | 142  | 501  | 155  | 413   | Tr[69,69,202,202]       | Tr[144,144,703,703]       |
| HERC5        | 281  | 283  | 334  | 1179 | 384  | 1282  | Tr[281,281,475,483]     | Tr[283,283,3654,3663]     |
| IL1RN        | 1748 | 2128 | 1912 | 4169 | 2142 | 4270  | Tr[1748,1748,2524,2535] | Tr[2128,2133,6348,6352]   |
| MYL12B       | 599  | 1455 | 937  | 1967 | 1056 | 1817  | Tr[599,705,1656,2289]   | Tr[1455,1714,2055,2673]   |
| TNFAIP6      | 99   | 213  | 175  | 328  | 197  | 320   | Tr[99,101,314,330]      | Tr[213,214,494,517]       |
| CIT          | 15   | 16   | 17   | 21   | 21   | 20    | Tr[15,15,29,147]        | Tr[16,16,23,106]          |
| ARRDC4       | 80   | 124  | 144  | 348  | 166  | 351   | Tr[80,80,229,229]       | Tr[124,124,745,745]       |
| IGHG2        | 80   | 108  | 768  | 1824 | 706  | 1323  | Tr[80,159,1717,2063]    | Tr[108,262,3774,4330]     |
| OASL         | 565  | 539  | 637  | 2070 | 732  | 2231  | Tr[565,568,855,869]     | Tr[539,539,5983,5995]     |
| NSUN5P1      | 65   | 52   | 1244 | 913  | 1254 | 793   | Tr[65,541,2263,2841]    | Tr[52,349,1451,1882]      |
| CD86         | 289  | 575  | 354  | 754  | 405  | 694   | Tr[289,291,522,537]     | Tr[575,575,782,794]       |
| CSTA         | 111  | 166  | 112  | 232  | 129  | 215   | Tr[111,111,146,167]     | Tr[166,167,297,305]       |
| BPG246D15.9  | 24   | 65   | 109  | 380  | 485  | 650   | Tr[24,24,4599,5366]     | Tr[65,65,5571,5765]       |
| IMMP1L       | 48   | 29   | 61   | 56   | 71   | 50    | Tr[48,48,110,118]       | Tr[29,29,63,75]           |
| CD248        | 0    | 0    | 175  | 94   | 108  | 43    | Tr[0,0,534,534]         | Tr[0,0,105,105]           |
| CADM1        | 6    | 14   | 13   | 23   | 17   | 22    | Tr[6,6,35,136]          | Tr[14,14,30,102]          |
| KRT1         | 134  | 81   | 356  | 205  | 426  | 181   | Tr[134,134,833,833]     | Tr[81,81,297,297]         |
| C12orf42     | 96   | 30   | 125  | 63   | 143  | 54    | Tr[96,99,215,353]       | Tr[30,31,75,127]          |
| C14orf64     | 505  | 358  | 657  | 429  | 756  | 390   | Tr[505,509,1054,1065]   | Tr[358,358,431,432]       |
| CTC-490G23.2 | 2    | 0    | 22   | 60   | 26   | 70    | Tr[2,2,44,44]           | Tr[0,0,242,242]           |
| CD177        | 6    | 3    | 51   | 177  | 48   | 199   | Tr[6,6,158,158]         | Tr[3,3,1292,1294]         |

## Simulated study: additional data

The following table shows the read counts obtained for the genes already described by **Errore. L'origine riferimento non è stata trovata.** in the main paper. For these genes the table shows that both RSEM and the centroids provide reliable estimations, despite all those genes are influenced by multireads. For the 5 genes that emerged as false positive results when estimated with RSEM, we notice that this tool sometimes is not able to correctly estimate the expression because of the lack of uniquely mapping reads. For simplicity, the mean values obtained for the two replicates are shown for RSEM and Centroids, while the Fuzzy read counts have been merged as described in the Methods.

| Induced variation of expression | Gene           | TRUE read count for CONTROL | RSEM (CONTROL) | Centroid (CONTROL) | Fuzzy red count (CONTROL) | TRUE read count for CASE | RSEM (CASE) | Centroid (CASE) | Fuzzy red count (CASE)  |
|---------------------------------|----------------|-----------------------------|----------------|--------------------|---------------------------|--------------------------|-------------|-----------------|-------------------------|
| Under                           | FADS2          | 1616                        | 1585.2         | 1597               | Tr[1580,1593,1600,1658]   | 808                      | 791.8       | 795             | Tr[784,791,798,850]     |
| Under                           | PDE4DIP        | 7174                        | 7014.4         | 6257               | Tr[2905,5353,7218,7882]   | 3587                     | 3525.2      | 3170            | Tr[1482,2688,3681,4366] |
| Under                           | U2AF1          | 1761                        | 1368.3         | 1123               | Tr[508,580,1668,1836]     | 880.5                    | 557.0       | 634             | Tr[264,289,984,1173]    |
| Under                           | WAC            | 2316                        | 2278.3         | 2283               | Tr[2273,2277,2291,2484]   | 1158                     | 1127.7      | 1142            | Tr[1136,1138,1145,1341] |
| Under                           | CLCA1          | 236                         | 227            | 232                | Tr[230,231,234,235]       | 118                      | 118         | 118             | Tr[117,118,118,119]     |
| Under                           | S100A8         | 124                         | 123.5          | 124                | Tr[122,123,124,125]       | 62                       | 59.5        | 60              | Tr[58,59,60,61]         |
| Under                           | BPG254F23.5    | 280                         | 132.4          | 40                 | Tr[0,35,50,297]           | 140                      | 56.9        | 21              | Tr[0,18,30,204]         |
| Under                           | EEF1A1         | 1008                        | 994.8          | 823                | Tr[415,667,1056,1930]     | 504                      | 483.5       | 426             | Tr[215,340,561,1425]    |
| Under                           | LYZ            | 196                         | 197.1          | 180                | Tr[149,156,205,383]       | 98                       | 95.8        | 95              | Tr[75,79,112,302]       |
| Under                           | SCGB1A1        | 66                          | 64.5           | 64                 | Tr[62,64,65,66]           | 33                       | 32.5        | 32              | Tr[31,32,33,34]         |
| Over                            | HLA-DQB1       | 2308                        | 981.1          | 2266               | Tr[155,1595,2937,15666]   | 4616                     | 1918        | 4506            | Tr[280,3147,5865,27821] |
| Over                            | IFI6           | 88                          | 88             | 88                 | Tr[87,88,88,89]           | 176                      | 172         | 174             | Tr[171,172,175,176]     |
| Over                            | IGF1R          | 1159                        | 1131.5         | 1144               | Tr[1142,1143,1145,1146]   | 2318                     | 2262        | 2284            | Tr[2280,2283,2284,2285] |
| Over                            | MUC5AC         | 620                         | 609.5          | 597                | Tr[583,592,602,626]       | 1240                     | 1213.5      | 1202            | Tr[1176,1197,1207,1231] |
| Over                            | POSTN          | 591                         | 578            | 586                | Tr[583,584,588,589]       | 1182                     | 1165        | 1173            | Tr[1171,1172,1174,1175] |
| Over                            | CD177          | 152                         | 146.9          | 147                | Tr[96,137,159,184]        | 304                      | 293.9       | 292             | Tr[183,273,310,335]     |
| Over                            | HLA-DRA        | 597                         | 569            | 587                | Tr[0,44,1130,4150]        | 1194                     | 1153.5      | 1181            | Tr[0,99,2263,8284]      |
| Over                            | NSUN5P1        | 446                         | 436.1          | 448                | Tr[55,333,568,1075]       | 892                      | 889.5       | 836             | Tr[117,682,1009,1540]   |
| Over                            | UBBP4          | 76                          | 75.7           | 76                 | Tr[16,75,76,316]          | 152                      | 149.5       | 150             | Tr[18,145,153,417]      |
| Over                            | MTRNR2L12      | 37                          | 37.3           | 37                 | Tr[1,36,39,121]           | 74                       | 71.2        | 74              | Tr[0,73,75,148]         |
| None                            | DUX4L7         | 45                          | 0              | 47                 | Tr[0,0,892,1247]          | 45                       | 204         | 46              | Tr[0,0,876,1238]        |
| None                            | CH507-152C13.1 | 323                         | 287.2          | 553                | Tr[0,10,1099,1185]        | 323                      | 440.4       | 364             | Tr[0,18,710,758]        |
| None                            | AC016698.1     | 32                          | 56.3           | 32                 | Tr[0,0,91,150]            | 32                       | 0           | 30              | Tr[0,0,87,148]          |
| None                            | MRPL51P2       | 13                          | 26             | 14                 | Tr[0,1,26,34]             | 13                       | 0           | 13              | Tr[0,0,26,33]           |
| None                            | CH507-152C13.4 | 13                          | 0              | 12                 | Tr[0,0,25,32]             | 13                       | 26          | 13              | Tr[0,0,26,33]           |
